# Supplementary material for: The combined use of acetazolamide and Rhodiola in the prevention and treatment of altitude sickness
Source: PubMed Central journal article supplement — Ann Transl Med. 2022 May;10(10):541. doi: 10.21037/atm-22-2111 (PMC9201178; doi:10.21037/atm-22-2111), 2022-05
Supplement: atm-10-10-541-supplementary.pdf [file atm-10-10-541-supplementary.pdf]

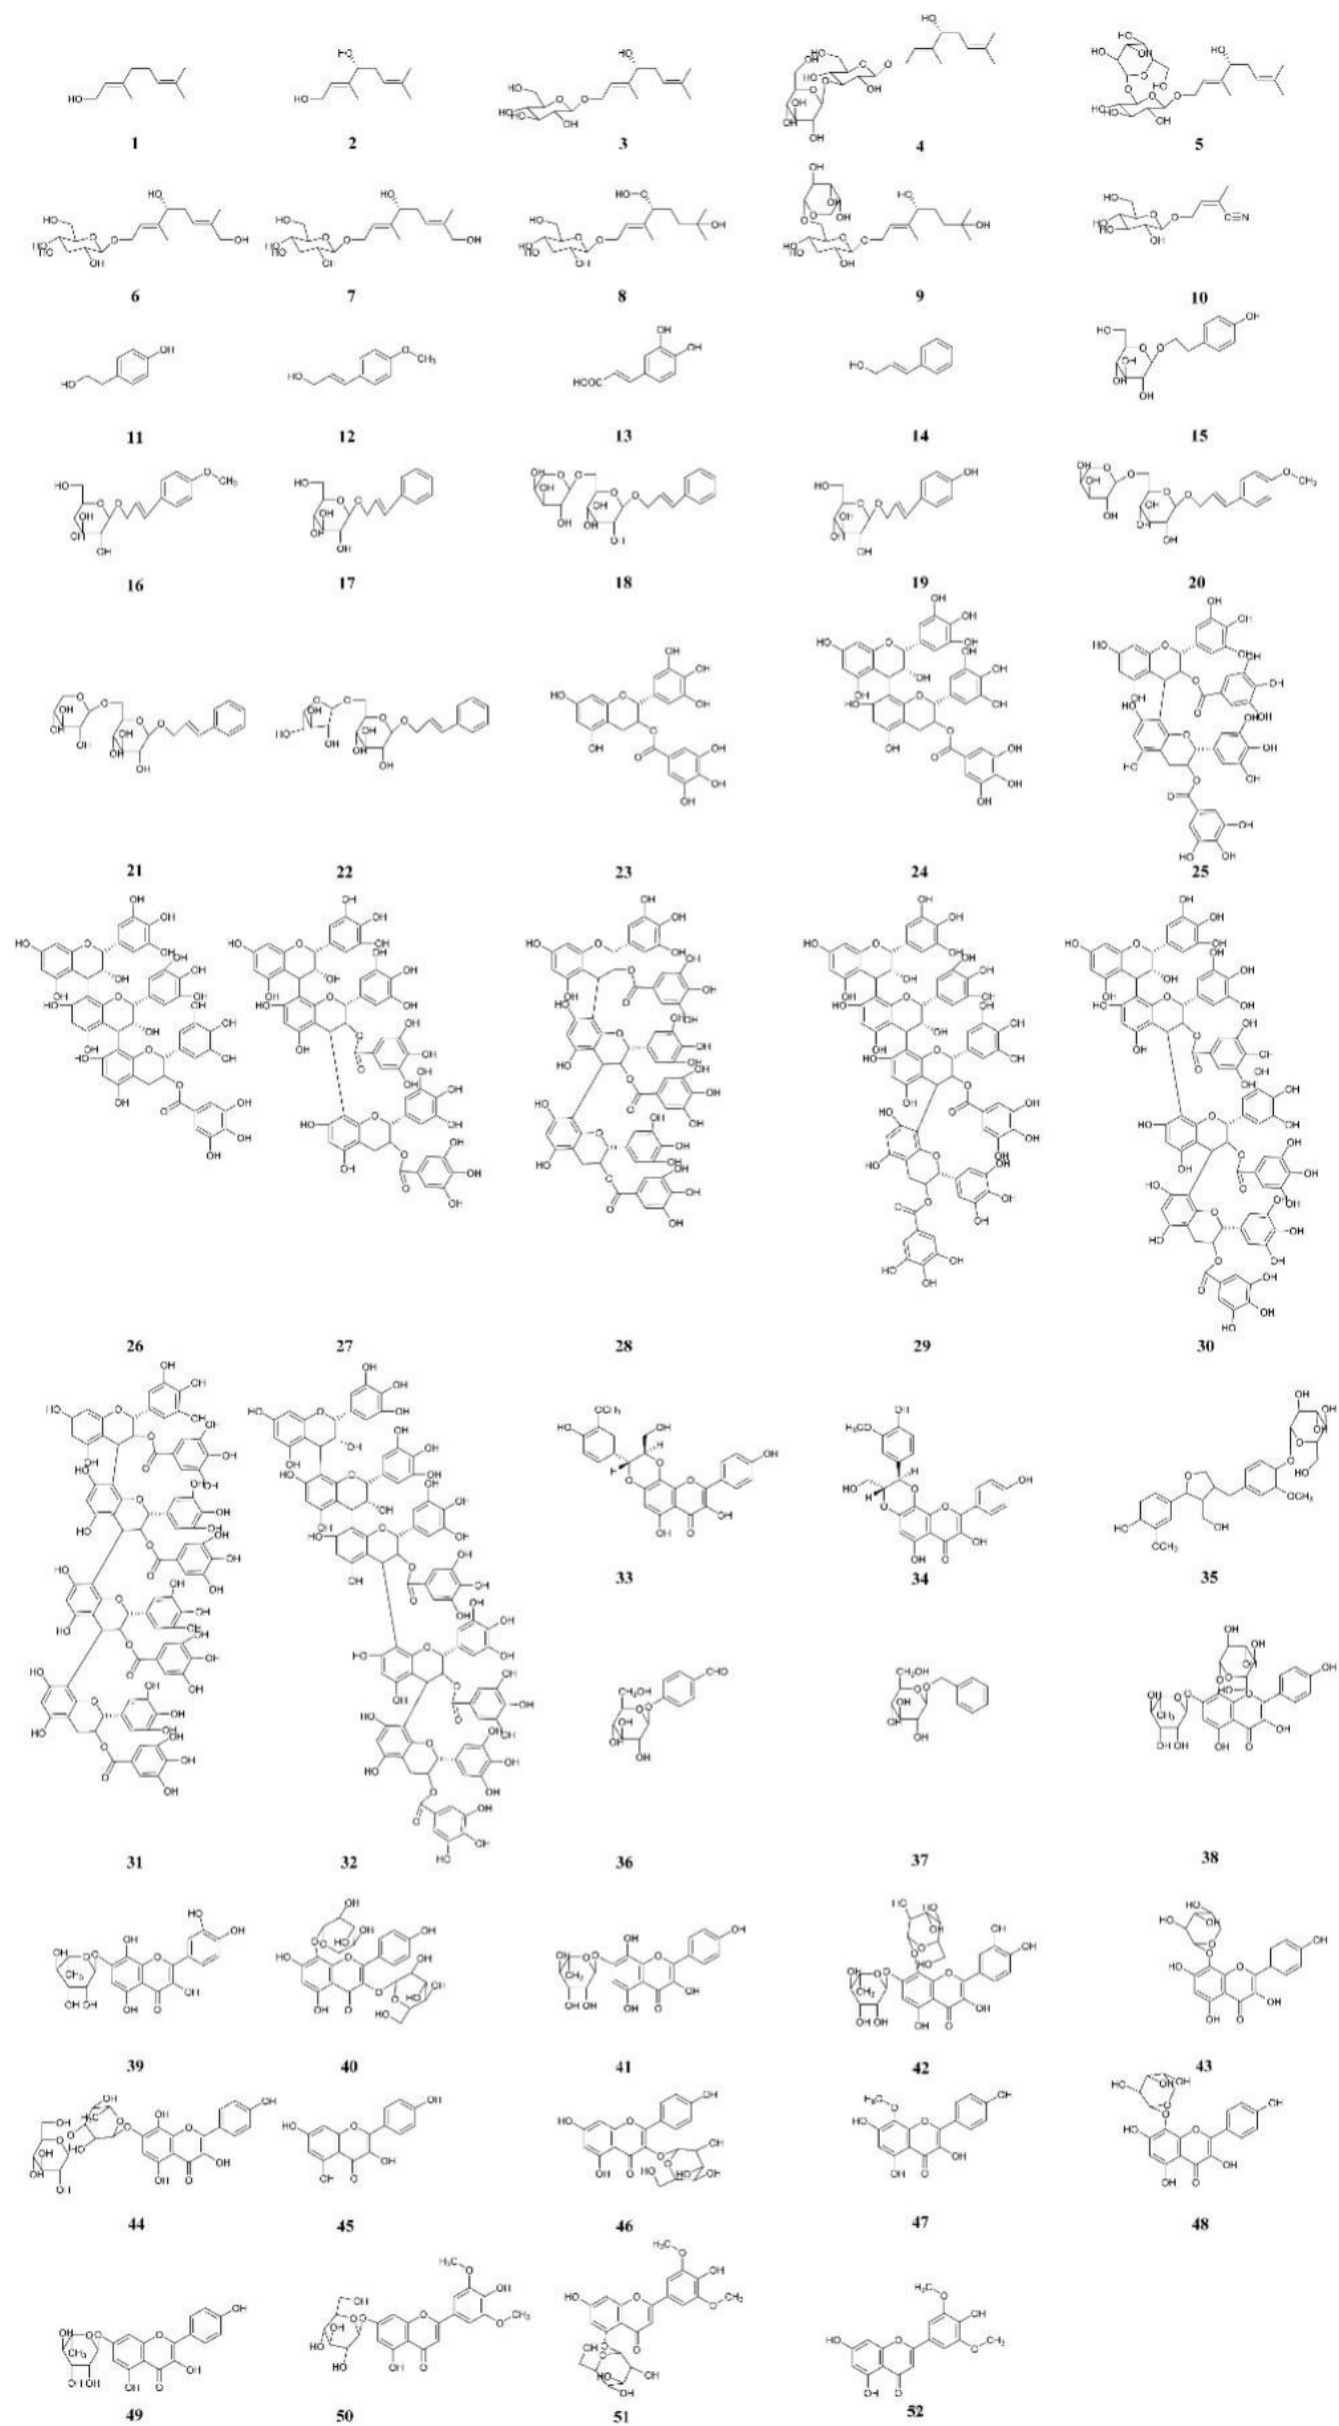Figure S1 52 chemical components of *Rbodiola*.

**Table S1** The targets of the *Rhodiola's* chemical constituents and acetazolamide

| ID | Name                                                                                                                                                                                                   | Targets                                                                                                                                                                                                                                                                                                                                                                                                                                                                                                                                                                                                                                                                                                                                                                                                                                                                                                                                                                                                                                                                                                                                                                                                                                                                                                                                                                                                                                                                                                                                                                                                                                                                                                                                                                                                                                                                                                                                                                                                                                                                                                                                                                                                                                                                                                                                                                                                                                                                                                                                                                                                                                   |
|----|--------------------------------------------------------------------------------------------------------------------------------------------------------------------------------------------------------|-------------------------------------------------------------------------------------------------------------------------------------------------------------------------------------------------------------------------------------------------------------------------------------------------------------------------------------------------------------------------------------------------------------------------------------------------------------------------------------------------------------------------------------------------------------------------------------------------------------------------------------------------------------------------------------------------------------------------------------------------------------------------------------------------------------------------------------------------------------------------------------------------------------------------------------------------------------------------------------------------------------------------------------------------------------------------------------------------------------------------------------------------------------------------------------------------------------------------------------------------------------------------------------------------------------------------------------------------------------------------------------------------------------------------------------------------------------------------------------------------------------------------------------------------------------------------------------------------------------------------------------------------------------------------------------------------------------------------------------------------------------------------------------------------------------------------------------------------------------------------------------------------------------------------------------------------------------------------------------------------------------------------------------------------------------------------------------------------------------------------------------------------------------------------------------------------------------------------------------------------------------------------------------------------------------------------------------------------------------------------------------------------------------------------------------------------------------------------------------------------------------------------------------------------------------------------------------------------------------------------------------------|
| 1  | Geraniol                                                                                                                                                                                               | ESR1 ALOX15 ESR1 ABC02 ACACA ACHE ACTA2 ACTL6A ACVR1 ADIPOQ AFF4 AGER AHCTF1 AKR1C1 AP521 APBB2 APPL1 ARNLT ATF3 ATF4 ATF6 ATG12 ATG5 ATG7 BAK1 BAX BAZ1B BAZ2B BBX BCL11A BCL2 BCL2L1 BCL2L2 BCL6 BCLAF1 BDNF BIRC5 BMP6 BNIP3 BRCA1 BRCA2 BTF3 BUB1 BUB1B CASP3 CASP8 CASP9 CAT CBAF2T2 CBFB CCL4 CCNA2 CCNB1 CCND1 CD86 CDC20 CDC25A CDC25C CDC45 CDC7 CDH1 CDK1 CDK2 CDK4 CDKN1A CDKN1B CDKN2C CDKN3 CDT1 CEBPB CEBPG CENPE CENPF CHEK1 CIT CNBP CNGA2 COL1A1 COX7C CREB3 CREB3L2 CRP CTNNB1 CTSD CXCL8 CYB5A CYBB CYC1 CYP1A1 CYP1B1 CYP2B6 CYP2E1 CYP3A5 DBF4 DDDT3 DEK DMTF1 DNAJC1 DR1 DTYMK E2F1 E2F8 EHF EIF2AK3 EIF2S1 ELAVL2 ELF1 ELK4 ERC1 ERN1 ESPL1 ESR1 ESR2 ETS2 ETV1 EWSR1 EZH2 FABP4 FADS1 FANCG FASN FBXO5 FOS FOSL1 FOSL2 FOXA2 FOXJ3 FOXM1 FOXO4 FST FUBP1 G6PD GABRA1 GABRB1 GATAD1 GBX2 GCG GDNF GMNN GNA15 GNAL GOBP2 GPX1 GSK3B GSR GSTP1 GTF2B GTF2H1 GTF2IRD1 GTF3A GTF3C1 HAVCR1 HBB HBP1 HIVEP1 HLF HMBOX1 HMG20B HMGB2 HMGB3 HMGC R HMGXB3 HMGXB4 HMOX1 HNRNPAB HOXA5 HOXB13 HOXC6 HRAS HSPA2 HSTRPA HTR3A ICAM1 ID1 ID3 IFNG IL10 IL16 IL17A IL18 IL1A IL1B IL1R2 IL6 IL7R ILF2 INS1 IRF1 IRF6 IRF7 IRF9 JARID2 JMJD1C JUN JUNB JUND KDR KHDRBS1 KIF11 KIF15 KIF22 KIF23 KIF2C KLF11 KLF13 KLF3 KLF4 KLF5 KLF6 KLF7 KNTC1 KRAS KRBOX4 LCAT LDLR LIF LPL LZTFL1 LZTR1 MAD2L1 MAFF MAFG MAOA MAOB MAP2K1 MAPK1 MAPK3 MCM2 MEF2A MEN1 MKI67 MMP3 MNT MPO MTOR MVK MXD1 MXD4 MX1 MYB MYBL1 MYBL2 MYO6 NASP NCAPH NCOR1 NDP NEK2 NFAT5 NFE2L1 NFE2L2 NFIL3 NFKB1 NFKBIA NFYB NOS2 NOX1 NPM1 NQO1 NR1D1 NR1D2 NR2F1 NR3C1 NR4A2 NSD2 NUSAP1 ODC1 OGG1 OLFRAF3 OR1A1 OR1G1 PA2G4 PBX1 PCNA PGR PHB PHF1 PHF21A PHTF1 PIK3R1 PKMYT1 PLAGL1 PLK1 POLA1 POLE POLR1G POR PPARA PPARG PRC1 PRDM4 PRDX3 PRKAA1 PTEN PTGS2 PTTG1 PWP1 RACGAP1 RAD51 RAD54B RAD54L RAF1 RCAN1 RCOR3 RELB RFX5 RNF19A RUVBL1 RUVBL2 SATB1 SERPINB3 SIM2 SIRT1 SKP2 SLC18A2 SLC2A4RG SLC6A3 SMAD3 SMAD6 SMAD7 SMARCA2 SMARCAL1 SMC4 SNCA SOD1 SOD2 SOX9 SP100 SP140L SQSTM1 SREBF1 SREBF2 STAT1 STAT2 STAT6 STMN1 SUB1 SUPT16H SUPT5H TARDBP TCEAL1 TCF12 TCF25 TCF4 TCF7L2 TERF1 TFAP2A TFCP2 TFDP1 TGFBI TGIF1 TH TIMELESS TK1 TLE1 TLR4 TNF TP53 TPX2 TRAI P TRAK1 TRIM29 TRPS1 TRPV1 TSC22D3 TTK TULP3 TULP4 TYMS UBE2C UBE2N UBP1 UCP2 VCAM1 VEGFA VLDLR XBP1 ZBTB1 ZBTB10 ZBTB11 ZBTB20 ZHX2 ZMIZ1 ZMYM4 ZMYND11 ZNF134 ZNF165 ZNF189 ZNF195 ZNF207 ZNF211 ZNF224 ZNF23 ZNF248 ZNF263 ZNF264 ZNF274 ZNF281 ZNF304 ZNF329 ZNF331 ZNF334 ZNF354A ZNF394 ZNF410 ZNF44 ZNF467 ZNF468 ZNF557 ZNF571 ZNF589 ZNF606 ZNF611 ZNF75D ZNF768 ZNF84 ZSCAN16 ZSCAN18 ZSCAN31 ZSCAN5A ZZZ3 ABL2 AF1548 Acox1 Anxa5 DHRS1 EIF2B1 ERBB2 HB1 L2 MAGI2 |
| 2  | Rosiridol                                                                                                                                                                                              | ABL2 ALOX12 Acox1 BRD7 DHRS1 ECH1 EIF2B1 ERBB2 Ets1 HB1                                                                                                                                                                                                                                                                                                                                                                                                                                                                                                                                                                                                                                                                                                                                                                                                                                                                                                                                                                                                                                                                                                                                                                                                                                                                                                                                                                                                                                                                                                                                                                                                                                                                                                                                                                                                                                                                                                                                                                                                                                                                                                                                                                                                                                                                                                                                                                                                                                                                                                                                                                                   |
| 3  | Rosiridin                                                                                                                                                                                              | ACR ALOX12 AVD CSDE1 CUL5 Cdc3e DNMT1 EXOSC9 FES Flot2                                                                                                                                                                                                                                                                                                                                                                                                                                                                                                                                                                                                                                                                                                                                                                                                                                                                                                                                                                                                                                                                                                                                                                                                                                                                                                                                                                                                                                                                                                                                                                                                                                                                                                                                                                                                                                                                                                                                                                                                                                                                                                                                                                                                                                                                                                                                                                                                                                                                                                                                                                                    |
| 4  | Rhodiolosid B                                                                                                                                                                                          | ACR ALOX12 Anxa5 CELF4 CPSF3 CSDE1 DNMT1 EIF2S1 Flot2 Fnta                                                                                                                                                                                                                                                                                                                                                                                                                                                                                                                                                                                                                                                                                                                                                                                                                                                                                                                                                                                                                                                                                                                                                                                                                                                                                                                                                                                                                                                                                                                                                                                                                                                                                                                                                                                                                                                                                                                                                                                                                                                                                                                                                                                                                                                                                                                                                                                                                                                                                                                                                                                |
| 5  | Rhodiolosid C                                                                                                                                                                                          | ACR ALOX12 Anxa5 CDC13 CELF4 CSDE1 ESA1 Fah Flot2 GBP1                                                                                                                                                                                                                                                                                                                                                                                                                                                                                                                                                                                                                                                                                                                                                                                                                                                                                                                                                                                                                                                                                                                                                                                                                                                                                                                                                                                                                                                                                                                                                                                                                                                                                                                                                                                                                                                                                                                                                                                                                                                                                                                                                                                                                                                                                                                                                                                                                                                                                                                                                                                    |
| 6  | Rhodiolosid A                                                                                                                                                                                          | ALOX12 Anxa5 CHI1 CSDE1 CUL5 DNMT1 EIL3 Flot2 Irf1 MT-CYB                                                                                                                                                                                                                                                                                                                                                                                                                                                                                                                                                                                                                                                                                                                                                                                                                                                                                                                                                                                                                                                                                                                                                                                                                                                                                                                                                                                                                                                                                                                                                                                                                                                                                                                                                                                                                                                                                                                                                                                                                                                                                                                                                                                                                                                                                                                                                                                                                                                                                                                                                                                 |
| 7  | Rhodiolosid D                                                                                                                                                                                          | CC0490 CPA4 CSDE1 ECE2 EEF1AKMT4 EEF1AKMT4-ECE2 Ets1 GOT2 NUCB1 PES1                                                                                                                                                                                                                                                                                                                                                                                                                                                                                                                                                                                                                                                                                                                                                                                                                                                                                                                                                                                                                                                                                                                                                                                                                                                                                                                                                                                                                                                                                                                                                                                                                                                                                                                                                                                                                                                                                                                                                                                                                                                                                                                                                                                                                                                                                                                                                                                                                                                                                                                                                                      |
| 8  | Rhodiolosid EI                                                                                                                                                                                         | ACS2 ALG13 Acox1 Anxa5 BCKDHA CSNK1G1 CTNNB1 DNMT1 GRK2 HHEX                                                                                                                                                                                                                                                                                                                                                                                                                                                                                                                                                                                                                                                                                                                                                                                                                                                                                                                                                                                                                                                                                                                                                                                                                                                                                                                                                                                                                                                                                                                                                                                                                                                                                                                                                                                                                                                                                                                                                                                                                                                                                                                                                                                                                                                                                                                                                                                                                                                                                                                                                                              |
| 9  | Rhodiocyanoside A                                                                                                                                                                                      | ACAD8 ACO1 Anxa5 At1g07440 At1g07450 BMEI1586 CPSF3 ERBB2 FLNB HAO1                                                                                                                                                                                                                                                                                                                                                                                                                                                                                                                                                                                                                                                                                                                                                                                                                                                                                                                                                                                                                                                                                                                                                                                                                                                                                                                                                                                                                                                                                                                                                                                                                                                                                                                                                                                                                                                                                                                                                                                                                                                                                                                                                                                                                                                                                                                                                                                                                                                                                                                                                                       |
| 10 | Lotaustralin                                                                                                                                                                                           | ACBD6 ACO1 ARO7 Anxa5 At1g07440 At1g07450 CPSF3 CUL5 KIFC3 Kik1b4                                                                                                                                                                                                                                                                                                                                                                                                                                                                                                                                                                                                                                                                                                                                                                                                                                                                                                                                                                                                                                                                                                                                                                                                                                                                                                                                                                                                                                                                                                                                                                                                                                                                                                                                                                                                                                                                                                                                                                                                                                                                                                                                                                                                                                                                                                                                                                                                                                                                                                                                                                         |
| 11 | Tyrosol                                                                                                                                                                                                | CA5B hlyB CA5A CA2 ACS-2 AJM-1 AQP-2 B0024.4 B0228.6 BATH-10 C05B5.4 C06B8.7 C07D10.5 C08F1.10 C16H3.3 C17F4.7 C33D9.5 C33D9.6 C35E7.5 C39B5.2 C40A11.4 C49G7.12 CAV-1 CDC-14 CED-11 CEH-20 CEH-32 CEH-43 CEH-5 CES-2 CFZ-2 CHT-1 Ck1-1 CLEC-196 CLEC-266 CLEC-60 CPG-20 CPG-24 CUL1-16 CUL2-20 CUL2-24 CUL2-29 CUL2-9 DLG-1 DPY-14 DSH-1 EEED8.15 EFL-3 EYA-1 F13E9.11 F20C5.6 F27C1.1 F35D2.3 F36H5.4 F36H5.8 F39E9.7 F40G9.5 F49E12.10 F53B3.5 F53C3.3 F55C9.3 F55C9.5 F57G12.1 F58A6.9 FBXB-101 FBXB-102 FBXB-66 FBXB-88 FBXC-40 FKH-8 FLP-15 FMI-1 G6PC1 G6PD GADR-3 GSP-3 HAM-1 HCH-1 HIL-7 HIS-24 HMG-6 IGCN-1 IGCN-3 IGCN-4 INS1 INS-2 IRG-2 K01A2.3 K05C4.9 K06A5.2 KLP-11 LAM-1 LAM-3 LPR-3 LTD-1 MLS-2 MLT-11 MNP-1 MPS-2 MSD-2 MSD-4 MSP-142 MSP-152 MSP-19 MSP-3 MSP-31 MSP-33 MSP-36 MSP-38 MSP-40 MSP-45 MSP-49 MSP-50 MSP-53 MSP-55 MSP-56 MSP-59 MSP-64 MSP-65 MSP-74 MSP-76 MSP-77 MSP-78 MSP-81 MSP-2 NCAM-1 NCX-3 NHR-11 NOAH-1 NOAH-2 NSPD-2 NSPD-4 ODC-1 PTGS2 PTP-4 PTR-22 RIG-5 RSF-1 SKR-21 SOX-2 SPTF-1 SQST-1 SQT-3 SSP-16 SSQ-3 T02E9.5 T09B4.5 T14B4.19 T28B8.1 T28B6.3 TBB-4 TIR-1 TLN-1 UNC-129 UNC-39 UNC-44 W03G11.4 W04A8.4 W05H12.2 WDFY-3 WRT-10 Y106G6G.4 Y110A2AL.4 Y11D7A.3 Y41D4A.3 Y43F8B.2 Y58A7A.4 Y58A7A.5 Y59H11AM.1 Y82E9BR.17 ZIG-4 ZIP-8 ZK512.1 Cg3 ETR1 Ech1 GOT2 MAP2K2 MT-CYB NCBP1 SEC13 SENP7 SPEN                                                                                                                                                                                                                                                                                                                                                                                                                                                                                                                                                                                                                                                                                                                                                                                                                                                                                                                                                                                                                                                                                                                                                                                                                                                                                  |
| 12 | 3-(4-Methoxyphenyl)-2-propen-1-ol                                                                                                                                                                      | ACR AOC3 CDH-1 CDH-2 DDX50 EPN1 ERBB2 FBP1 GLR1 HDAC6                                                                                                                                                                                                                                                                                                                                                                                                                                                                                                                                                                                                                                                                                                                                                                                                                                                                                                                                                                                                                                                                                                                                                                                                                                                                                                                                                                                                                                                                                                                                                                                                                                                                                                                                                                                                                                                                                                                                                                                                                                                                                                                                                                                                                                                                                                                                                                                                                                                                                                                                                                                     |
| 13 | Caffeic acid                                                                                                                                                                                           | MMP9 MMP2 MMP1 CA2 GLS CA1 PTPN1 DPP4 CA7 CA5A CA6 CA9 GAA ALOX5 CA14 CA12 CA5B CA3 CA4 HDAC1 HDAC3 HDAC9 HDAC11 HDAC10 HDAC8 HDAC7 HDAC2 HDAC6 HDAC4 HDAC5 APP AKR1B1 ESR2 HSP90AB1 HSP90AA1 MCL1 GAPDH ALPL MPI GFER AKR1B10 NTMT1 ACACA ACHE ACLY ALOX15 ALOX5 ALPI ALT APP ARG1 ATP6V0D2 CASP3 CAT CCL2 CCL3 CCL4 COR1 COR2 CCR4 CD4 CD68 CDC20 CDK2 CHAT COMT COX2 CRH CTF1 CTSB CTSD CXCL2 CXCL8 CYP2E1 DAP DNAJB11 DPYSL4 EDN1 EGR1 ELMO2 ERF F3 FASN FLRT2 FLT4 G6PD GADD45A GLB1 GLS GOT1 GPT GSR GSTM1 GSTM2 GSTP1 GUSB H6PD HAVCR2 HES1 HLCS HMGC R HSP90B1 HSP61 IFNG IL10 IL1B IL2 IL21R IL4 IL6 KCNN4 KIF15 KIF20B KIF2C LDHA LDHB MAOA MAOB MAP2K5 MAPK1 MAPK3 MFN1 MGST1 MPO MRPL45 MRRF NDP NOS2 NOS3 NOTCH1 NT5E PDCC10 PGD PIK3R1 PLK1 PLK4 PPARG PRDX5 PTGS2 PTX3 RAF1 RELA SCD1 SERPINE1 SFXN4 SLC2A4 SNCA SREBF1 STK32A SULT1A1 SULT1A2 SULT1A3 SULT1C2 TNF TP53 TYR UBE2C UGT1A10 UGT1A3 UGT1A7 UGT1A8 VEGFA XDH ACX1 ATIC DHRS4 GAS2 GTF2I LDHB PH1897 RUVBL1 Rab22a SEC13                                                                                                                                                                                                                                                                                                                                                                                                                                                                                                                                                                                                                                                                                                                                                                                                                                                                                                                                                                                                                                                                                                                                                                                                                                                                                                                                                                                                                                                                                                                                                                                                                                        |
| 14 | Cinnamic alcohol                                                                                                                                                                                       | ABCB1 ABCB11 AKT1 ALPL BAX BCL2 BMP2 BMP6 BMP7 CASP1 CASP3 CAT CDH2 CERT1 CLDN11 CYP7A1 DDIT4 ENO2 FGF15 FN1 HES1 HIF1A MAP2 MTOR NGF NLRP3 NOG NOTCH1 NOX1 NOX2 NR0B2 NR1H4 OCLN PRKAR2B PYCARD RELA RPS6K1 RUNX2 SIRT1 SMAD1 SMAD5 SMAD9 SOD2 SP7 SPP1 TGFBI TJP1 TUBB3 TXNIP ACR AOC3 CDH-1 CDH-2 DDX50 Ddes2150 ERBB2 FBP1 GLR1 HDAC6 xynB xynD                                                                                                                                                                                                                                                                                                                                                                                                                                                                                                                                                                                                                                                                                                                                                                                                                                                                                                                                                                                                                                                                                                                                                                                                                                                                                                                                                                                                                                                                                                                                                                                                                                                                                                                                                                                                                                                                                                                                                                                                                                                                                                                                                                                                                                                                                       |
| 15 | Salidroside                                                                                                                                                                                            | ABCB1 ABCB11 AKT1 ALPL BAX BCL2 BMP2 BMP6 BMP7 CASP1 CASP3 CAT CDH2 CERT1 CLDN11 CYP7A1 DDIT4 ENO2 FGF15 FN1 HES1 HIF1A MAP2 MTOR NGF NLRP3 NOG NOTCH1 NOX1 NOX2 NR0B2 NR1H4 OCLN PRKAR2B PYCARD RELA RPS6K1 RUNX2 SIRT1 SMAD1 SMAD5 SMAD9 SOD2 SP7 SPP1 TGFBI TJP1 TUBB3 TXNIP Acox1 DDB1 DNMT1 Egr1 FGF1 HHEX KIFC3 Kik1b4 NUP214 PDE3B                                                                                                                                                                                                                                                                                                                                                                                                                                                                                                                                                                                                                                                                                                                                                                                                                                                                                                                                                                                                                                                                                                                                                                                                                                                                                                                                                                                                                                                                                                                                                                                                                                                                                                                                                                                                                                                                                                                                                                                                                                                                                                                                                                                                                                                                                                 |
| 16 | Vimalin                                                                                                                                                                                                | ACAD8 ACBD6 ACS1 ALOX12 Ache BMEI1586 CNDP1 CPSF3 CSDE1 CTDSP2                                                                                                                                                                                                                                                                                                                                                                                                                                                                                                                                                                                                                                                                                                                                                                                                                                                                                                                                                                                                                                                                                                                                                                                                                                                                                                                                                                                                                                                                                                                                                                                                                                                                                                                                                                                                                                                                                                                                                                                                                                                                                                                                                                                                                                                                                                                                                                                                                                                                                                                                                                            |
| 17 | Rosin                                                                                                                                                                                                  | ACAD8 ACBD6 ACS1 AF1548 ALOX12 Ache BMEI1586 CHN2 CNDP1 CPSF3                                                                                                                                                                                                                                                                                                                                                                                                                                                                                                                                                                                                                                                                                                                                                                                                                                                                                                                                                                                                                                                                                                                                                                                                                                                                                                                                                                                                                                                                                                                                                                                                                                                                                                                                                                                                                                                                                                                                                                                                                                                                                                                                                                                                                                                                                                                                                                                                                                                                                                                                                                             |
| 18 | Rosavin                                                                                                                                                                                                | EZH2 ACLY AQP1 AQP3 AR COX1 CYBG DSG3 EGF ESR2 FBN1 FBN2 FGF1 HAS1 HSPB1 IGF1 KL MC1R NOS2 NOS3 PGR PLOD3 POMC PPARG PTGER1 RAD23A RXRA SOD3 SRD5A2 TERT TPT1 TXN TYRPI ACR AMA-1 Ache BT4395 CDH-1 CDH-2 CSDE1 DOCK9 FES GGH                                                                                                                                                                                                                                                                                                                                                                                                                                                                                                                                                                                                                                                                                                                                                                                                                                                                                                                                                                                                                                                                                                                                                                                                                                                                                                                                                                                                                                                                                                                                                                                                                                                                                                                                                                                                                                                                                                                                                                                                                                                                                                                                                                                                                                                                                                                                                                                                             |
| 19 | Triandrin                                                                                                                                                                                              | ACAD8 ACBD6 Ache BMEI1586 CPSF3 CSDE1 CTDSP2 Chm DNMT1 FES                                                                                                                                                                                                                                                                                                                                                                                                                                                                                                                                                                                                                                                                                                                                                                                                                                                                                                                                                                                                                                                                                                                                                                                                                                                                                                                                                                                                                                                                                                                                                                                                                                                                                                                                                                                                                                                                                                                                                                                                                                                                                                                                                                                                                                                                                                                                                                                                                                                                                                                                                                                |
| 20 | 4-Methoxycinnamyl 6-O-alpha-L-arabinopyranosyl-b-D-glucopyranoside                                                                                                                                     | ACAD8 ACR Ache Anxa5 BT4395 CCNE1 CSDE1 GGH MJ0882 NF2                                                                                                                                                                                                                                                                                                                                                                                                                                                                                                                                                                                                                                                                                                                                                                                                                                                                                                                                                                                                                                                                                                                                                                                                                                                                                                                                                                                                                                                                                                                                                                                                                                                                                                                                                                                                                                                                                                                                                                                                                                                                                                                                                                                                                                                                                                                                                                                                                                                                                                                                                                                    |
| 21 | Cinnamyl 6-O-beta-D-xylopyranosyl-beta-D-glucopyranoside                                                                                                                                               | ACR Ache Acox1 Anxa5 BT4395 CCNE1 CDH-1 CDH-2 CSDE1 DPYS                                                                                                                                                                                                                                                                                                                                                                                                                                                                                                                                                                                                                                                                                                                                                                                                                                                                                                                                                                                                                                                                                                                                                                                                                                                                                                                                                                                                                                                                                                                                                                                                                                                                                                                                                                                                                                                                                                                                                                                                                                                                                                                                                                                                                                                                                                                                                                                                                                                                                                                                                                                  |
| 22 | Rosarin                                                                                                                                                                                                | ACR Ache Acox1 Anxa5 CCNE1 CDH-1 CDH-2 CSDE1 ESRRB FES                                                                                                                                                                                                                                                                                                                                                                                                                                                                                                                                                                                                                                                                                                                                                                                                                                                                                                                                                                                                                                                                                                                                                                                                                                                                                                                                                                                                                                                                                                                                                                                                                                                                                                                                                                                                                                                                                                                                                                                                                                                                                                                                                                                                                                                                                                                                                                                                                                                                                                                                                                                    |
| 23 | EGCG                                                                                                                                                                                                   | ABCB1 BCL2 NFE2L2 DYRK1A TTR POLB PGAM1 DNMT1 APP STAT1 PGD BACE1 HIF1A DHFR DHFRP1 TERT MAPKAPK5 MAPT PTGES MAPK14 MET PKM GAA JUN MMP14 BAZ2B MMP2 GALK1 DPP4 NFKB1 ELANE MEN1 KMT2A ESR1 PIN1 GLI3 MMP7 TP53 NR1I3 TSHR AR THRB EP300 CNR1 PPARG ATF6 CREBBP FASN ESRRA KAT2B KAT5 HSP90AB1 ABCB11 BCL2L10 BCL2L1 BCL2L2 NCOA3 MCL1 NCOA1 BCL2A1 NCF1 PTGER2 GNAO1 RGS16 RGS8 RGS7 RGS19 RGS4 MAPK1 RAD51 SLC12A5 LMNA MAP3K3 MAP4K2 NPSR1 KLF5 NPBWR1 RGS12 GNAH1 GLA GBA BLM MBNL1 KCHN2 GAPDH GSK3B S1PR3 WEE1 NPY2R NPY1R HSP90AA1 RBBP9 VCP MCOLN3 S1PR4 EIF2AK3 JAK2 SLC6A3 ALPL X MPI DLD CACNA1B KCNQ1 CBFB RUNX1 NOD2 PTPN22 OPRK1 UBE2N NOD1 DUSP3 GPR55 CTNNB1 PHOSPHO1 PLEC TNFSF10 SENP6 EIF4H ALPI APLNR SENP8 UBE2I UBA2 SAE1 NLRP1 NLRP3 SENP7 GPR35 FKBP1A EIF4G1 CACNA1H RXFP1 PTGS2 PTGS1 EPAS1 USP2 RAB9A DRD2 NPC1 MDM4 MDM2 EYA2 ADRB2 APOBEC3A APOBEC3G TRHR KAT2A NTSR1 DRD1 APAF1 CCT2 TRP1 NR3C1 VDR NR1H4 RXRA PPARD ALB AHR PPARA NR1I2 NRP2 ATAD5 CYP19A1 RARA vif HDAC9 MITF ESR2 KCN6 YAP1 AKR1B10 ERBB2 RPSA PGR SMAD3 SMAD2 CGAS CASP3 CASP7 HSF1 SLC01B3 SLC01B1 ACE ICAM1 AAMDCC AAR2 AASDH ABCA1 ABCB1 ABCB10 ABCB11 ABCO1 ABCO2 ABCO4 ABCO5 ABCO3 ABCO1 ABCG1 ABCG2 ABHD6 ABL2 ABR ACACA ACADM ACADSB ACAP2 ACAT2 ACE ACLY ACOT13 ACSL1 ACS2 ACTA2 ACTB ACT2 ACTR10 ADAM19 ADAM20 ADAMTS12 ADAMTS15 ADAMTS4 ADAMTS5 ADAMTSL4-AS1 ADARB1 ADAT1 ADGRE1 ADM ADRA1B ADRB2 ADSS ADSS2 AFF1 AFG1L AGAP1 AGER AGL AGPS AGTR1 AHCY AHR AIDA AIFM1 AIMP1 AJUBA AKAP13 AKAP9 AKIP1 AKIRIN2 AKR1C1 AKR1C2 AKR1C3 AKT1 AKT3 AKTIP ALDH3A2 ALDOA ALDOC ALG14 ALG6 ALG8 ALPK2 AMH AMMECR1 AMPD1 ANAPC10 ANAPC4 ANAPC7 ANK1B1 ANKMY2 ANKRD10 ANKRD26 ANKRD36 ANKRD44 ANO1 ANO4 ANO6 ANXA11 ANXA4 APOEP AP1S3 AP2A2 AP5S1 APAF1 ACR ATIC Ache Alad CAPN9 CCNE1 CSDE1 CUL5 Flot2 HA                                                                                                                                                                                                                                                                                                                                                                                                                                                                                                                                                                                                                                                                                                                                                                                                                                |
| 24 | EGC-EGCG                                                                                                                                                                                               | ALOX12 AZGP1 Alad CSDE1 Cyb5a EIF4A1 F13A1 FUT8 Flot2 GAL10                                                                                                                                                                                                                                                                                                                                                                                                                                                                                                                                                                                                                                                                                                                                                                                                                                                                                                                                                                                                                                                                                                                                                                                                                                                                                                                                                                                                                                                                                                                                                                                                                                                                                                                                                                                                                                                                                                                                                                                                                                                                                                                                                                                                                                                                                                                                                                                                                                                                                                                                                                               |
| 25 | 2EGCG                                                                                                                                                                                                  | ACBD7 ALOX12 Ache CITED2 Capn2 MKI67 NKT1 PAB1 PH0601 PRPS1                                                                                                                                                                                                                                                                                                                                                                                                                                                                                                                                                                                                                                                                                                                                                                                                                                                                                                                                                                                                                                                                                                                                                                                                                                                                                                                                                                                                                                                                                                                                                                                                                                                                                                                                                                                                                                                                                                                                                                                                                                                                                                                                                                                                                                                                                                                                                                                                                                                                                                                                                                               |
| 26 | 2EGC-EGCG                                                                                                                                                                                              | ACX1 ARHGAP11A ARHGEF12 CDC4 CITED2 CSDE1 CUL1 CYP2C5 Cnot4 F13A1                                                                                                                                                                                                                                                                                                                                                                                                                                                                                                                                                                                                                                                                                                                                                                                                                                                                                                                                                                                                                                                                                                                                                                                                                                                                                                                                                                                                                                                                                                                                                                                                                                                                                                                                                                                                                                                                                                                                                                                                                                                                                                                                                                                                                                                                                                                                                                                                                                                                                                                                                                         |
| 27 | EGC-2EGCG                                                                                                                                                                                              | ACBD7 CPK1 CSDE1 CUL1 CUL5 EIF4A1 EP300 GAL10 GOT1 IL10RA                                                                                                                                                                                                                                                                                                                                                                                                                                                                                                                                                                                                                                                                                                                                                                                                                                                                                                                                                                                                                                                                                                                                                                                                                                                                                                                                                                                                                                                                                                                                                                                                                                                                                                                                                                                                                                                                                                                                                                                                                                                                                                                                                                                                                                                                                                                                                                                                                                                                                                                                                                                 |
| 28 | 3EGCG                                                                                                                                                                                                  | yh1A yx1F ARHGAP11A AZGP1 Alad CDC13 CKX7 CSDE1 Capn2 Dab1                                                                                                                                                                                                                                                                                                                                                                                                                                                                                                                                                                                                                                                                                                                                                                                                                                                                                                                                                                                                                                                                                                                                                                                                                                                                                                                                                                                                                                                                                                                                                                                                                                                                                                                                                                                                                                                                                                                                                                                                                                                                                                                                                                                                                                                                                                                                                                                                                                                                                                                                                                                |
| 29 | 2EGC-2EGCG                                                                                                                                                                                             | ACADVL ACX1 ARHGAP11A CSDE1 Grin3a HSD11B1 Ighg1 MMP2 RGS6 SERPING1                                                                                                                                                                                                                                                                                                                                                                                                                                                                                                                                                                                                                                                                                                                                                                                                                                                                                                                                                                                                                                                                                                                                                                                                                                                                                                                                                                                                                                                                                                                                                                                                                                                                                                                                                                                                                                                                                                                                                                                                                                                                                                                                                                                                                                                                                                                                                                                                                                                                                                                                                                       |
| 30 | EGC-3EGCG                                                                                                                                                                                              |                                                                                                                                                                                                                                                                                                                                                                                                                                                                                                                                                                                                                                                                                                                                                                                                                                                                                                                                                                                                                                                                                                                                                                                                                                                                                                                                                                                                                                                                                                                                                                                                                                                                                                                                                                                                                                                                                                                                                                                                                                                                                                                                                                                                                                                                                                                                                                                                                                                                                                                                                                                                                                           |
| 31 | 4EGCG                                                                                                                                                                                                  |                                                                                                                                                                                                                                                                                                                                                                                                                                                                                                                                                                                                                                                                                                                                                                                                                                                                                                                                                                                                                                                                                                                                                                                                                                                                                                                                                                                                                                                                                                                                                                                                                                                                                                                                                                                                                                                                                                                                                                                                                                                                                                                                                                                                                                                                                                                                                                                                                                                                                                                                                                                                                                           |
| 32 | 2EGC-3EGCG                                                                                                                                                                                             | ACR AR AZGP1 CBL4 CLPP CPK1 CSDE1 CUL1 GAL10 GOT1                                                                                                                                                                                                                                                                                                                                                                                                                                                                                                                                                                                                                                                                                                                                                                                                                                                                                                                                                                                                                                                                                                                                                                                                                                                                                                                                                                                                                                                                                                                                                                                                                                                                                                                                                                                                                                                                                                                                                                                                                                                                                                                                                                                                                                                                                                                                                                                                                                                                                                                                                                                         |
| 33 | Rhodiolin                                                                                                                                                                                              | CEP3 CLIC2 CPSF3 Cyb5b FKBP4 HB1 HD1794 L2 NUP214 PAL                                                                                                                                                                                                                                                                                                                                                                                                                                                                                                                                                                                                                                                                                                                                                                                                                                                                                                                                                                                                                                                                                                                                                                                                                                                                                                                                                                                                                                                                                                                                                                                                                                                                                                                                                                                                                                                                                                                                                                                                                                                                                                                                                                                                                                                                                                                                                                                                                                                                                                                                                                                     |
| 34 | (2R,3R)-6,8-dihydroxy-2-(4-hydroxy-3-methoxyphenyl)-3-(hydroxymethyl)-9-(4-hydroxyphenyl)-2,3-dihydro-7H-(1,4)dioxino[2,3-h]chromen-7-one                                                              | ACADVL CAM CEP3 CLCNKA CPSF3 DHRS1 Ets1 GCDH H2-Ea Musk                                                                                                                                                                                                                                                                                                                                                                                                                                                                                                                                                                                                                                                                                                                                                                                                                                                                                                                                                                                                                                                                                                                                                                                                                                                                                                                                                                                                                                                                                                                                                                                                                                                                                                                                                                                                                                                                                                                                                                                                                                                                                                                                                                                                                                                                                                                                                                                                                                                                                                                                                                                   |
| 35 | (2R,3S,4R,5R,6S)-2-(4-((5-(4-hydroxy-3-methoxyphenyl)-4-(hydroxymethyl)tetrahydrofuran-3-yl)methyl)-2-methoxyphenoxy)-6-(hydroxymethyl)tetrahydro-2H-pyran-3,4,5-triol                                 | ACR ALOX12 BT4395 CDC19 CPB2 CSDE1 Dlg1 Gcm1 H2-K1 MID1                                                                                                                                                                                                                                                                                                                                                                                                                                                                                                                                                                                                                                                                                                                                                                                                                                                                                                                                                                                                                                                                                                                                                                                                                                                                                                                                                                                                                                                                                                                                                                                                                                                                                                                                                                                                                                                                                                                                                                                                                                                                                                                                                                                                                                                                                                                                                                                                                                                                                                                                                                                   |
| 36 | 4-(((2S,3R,4S,5S,6R)-3,4,5-Trihydroxy-6-(hydroxymethyl)tetrahydro-2H-pyran-2-yl)oxy) benzaldehyde                                                                                                      | ACO1 At1g07440 At1g07450 BMPR2 CKX7 CPSF3 CST7 DMD FN1 FOL1                                                                                                                                                                                                                                                                                                                                                                                                                                                                                                                                                                                                                                                                                                                                                                                                                                                                                                                                                                                                                                                                                                                                                                                                                                                                                                                                                                                                                                                                                                                                                                                                                                                                                                                                                                                                                                                                                                                                                                                                                                                                                                                                                                                                                                                                                                                                                                                                                                                                                                                                                                               |
| 37 | Benzyl beta-d-glucopyranoside                                                                                                                                                                          | ACBD6 ACO1 At1g07440 At1g07450 CPSF3 FGA HAO1 IGF1R KIFC3 Kik1b4                                                                                                                                                                                                                                                                                                                                                                                                                                                                                                                                                                                                                                                                                                                                                                                                                                                                                                                                                                                                                                                                                                                                                                                                                                                                                                                                                                                                                                                                                                                                                                                                                                                                                                                                                                                                                                                                                                                                                                                                                                                                                                                                                                                                                                                                                                                                                                                                                                                                                                                                                                          |
| 38 | 3,5-dihydroxy-2-(4-hydroxyphenyl)-8-(((2R,3R,4S,5S,6S)-3,4,5,6-tetrahydroxytetrahydro-2H-pyran-2-yl)oxy)-7-(((2S,3R,4R,5R,6S)-3,4,5-trihydroxy-6-methyltetrahydro-2H-pyran-2-yl)oxy)-4H-chromen-4-one  | CSDE1 DPYS EPHB2 FAS2 GOT1 LYS3 MAG11 MID1 Ngly1 PES1                                                                                                                                                                                                                                                                                                                                                                                                                                                                                                                                                                                                                                                                                                                                                                                                                                                                                                                                                                                                                                                                                                                                                                                                                                                                                                                                                                                                                                                                                                                                                                                                                                                                                                                                                                                                                                                                                                                                                                                                                                                                                                                                                                                                                                                                                                                                                                                                                                                                                                                                                                                     |
| 39 | Rhodiolgin                                                                                                                                                                                             | ACR AMA-1 COG2 CRS2 CSDE1 EXOSC9 F13A1 FAS2 GAN Nlgn1                                                                                                                                                                                                                                                                                                                                                                                                                                                                                                                                                                                                                                                                                                                                                                                                                                                                                                                                                                                                                                                                                                                                                                                                                                                                                                                                                                                                                                                                                                                                                                                                                                                                                                                                                                                                                                                                                                                                                                                                                                                                                                                                                                                                                                                                                                                                                                                                                                                                                                                                                                                     |
| 40 | 5,7-dihydroxy-2-(4-hydroxyphenyl)-3-((3,4,5-trihydroxy-6-(hydroxymethyl)tetrahydro-2H-pyran-2-yl)oxy)-8-((3,4,5-trihydroxytetrahydro-2H-pyran-2-yl)oxy)-4H-chromen-4-one                               | Acox1 DNMT1 Fah GPD1L HAO1 HHEX MT-CYB PCNA PMP2 RAB31                                                                                                                                                                                                                                                                                                                                                                                                                                                                                                                                                                                                                                                                                                                                                                                                                                                                                                                                                                                                                                                                                                                                                                                                                                                                                                                                                                                                                                                                                                                                                                                                                                                                                                                                                                                                                                                                                                                                                                                                                                                                                                                                                                                                                                                                                                                                                                                                                                                                                                                                                                                    |
| 41 | Rhodionin                                                                                                                                                                                              | ACR Anxa5 CSDE1 Cyt-b5 DDX58 Fah GAN GOT1 HGD MYD88                                                                                                                                                                                                                                                                                                                                                                                                                                                                                                                                                                                                                                                                                                                                                                                                                                                                                                                                                                                                                                                                                                                                                                                                                                                                                                                                                                                                                                                                                                                                                                                                                                                                                                                                                                                                                                                                                                                                                                                                                                                                                                                                                                                                                                                                                                                                                                                                                                                                                                                                                                                       |
| 42 | 2-(3,4-dihydroxyphenyl)-3,5-dihydroxy-8-((3,4,5-trihydroxy-6-(hydroxymethyl)tetrahydro-2H-pyran-2-yl)oxy)-7-(((2S,3R,4R,5R,6S)-3,4,5-trihydroxy-6-methyltetrahydro-2H-pyran-2-yl)oxy)-4H-chromen-4-one | EPHB2 Ech1 HBP1 MAP2K6 PES1 RUVBL1 SLC30A9 VC1409 VTC2 Vcp                                                                                                                                                                                                                                                                                                                                                                                                                                                                                                                                                                                                                                                                                                                                                                                                                                                                                                                                                                                                                                                                                                                                                                                                                                                                                                                                                                                                                                                                                                                                                                                                                                                                                                                                                                                                                                                                                                                                                                                                                                                                                                                                                                                                                                                                                                                                                                                                                                                                                                                                                                                |
| 43 | 3,5,7-trihydroxy-2-(4-hydroxyphenyl)-8-((3,4,5-trihydroxytetrahydro-2H-pyran-2-yl)oxy)-4H-chromen-4-one                                                                                                | ACADS ASS1 Acox1 CC0490 CPSF3 Cyb5r3 DNAJC30 Egr1 FGA HB1                                                                                                                                                                                                                                                                                                                                                                                                                                                                                                                                                                                                                                                                                                                                                                                                                                                                                                                                                                                                                                                                                                                                                                                                                                                                                                                                                                                                                                                                                                                                                                                                                                                                                                                                                                                                                                                                                                                                                                                                                                                                                                                                                                                                                                                                                                                                                                                                                                                                                                                                                                                 |
| 44 | 7-((3,5-dihydroxy-6-methyl-4-(((2S,3R,4S,5S,6R)-3,4,5-trihydroxy-6-(hydroxymethyl)tetrahydro-2H-pyran-2-yl)oxy)tetrahydro-2H-pyran-2-yl)oxy)-3,5,8-trihydroxy-2-(4-hydroxyphenyl)-4H-chromen-4-one     | ARSA COMTD1 DBT DSP FAS2 GAS2 GPH1 MAGI1 MID1 PES1                                                                                                                                                                                                                                                                                                                                                                                                                                                                                                                                                                                                                                                                                                                                                                                                                                                                                                                                                                                                                                                                                                                                                                                                                                                                                                                                                                                                                                                                                                                                                                                                                                                                                                                                                                                                                                                                                                                                                                                                                                                                                                                                                                                                                                                                                                                                                                                                                                                                                                                                                                                        |
| 45 | Kaempferol                                                                                                                                                                                             | CA7 AHR CYP1B1 CISD1 CA12 HSD17B2 DPP4 CYP1A1 CYP1A2 CSNK2B CSNK2A1 CSNK2A2 TYR HSD17B1 XDH NOX4 Dyrk1a Akr1b1 HIF1A ALOX15 MPO FLT3 ABCC1 ALOX5 GSK3B GSK3A SLC2A1 ABCG2 PGR CYP2C9 Abcb1a ABCB1 ESR1 Sialidase CA2 ESRRA ESR2 AR CTDSP1 CYP2D6 DAPK1 MAPT HDAC9 BACE1 CYP3A4 RARA Enoyl GLO1 GLI3 NFE2L2 CDK6 POLH HPGD LOC116160065 NR1I3 CCNB3 CDK1 CCNB2 CCNB1 NR1I2 Neuraminidase BCHE RACGAP1 POLI PIM2 CLK1 STK16 Syk Plcg2 Plcg1 PAFAH1B3 CHRMI1 Prkaa2 Pparg RdRp PIP4K2A daf ADAM10 ADAM17 SIAE NR3C1 CYP19A1 PNLP SMAD3 SMAD2 APP NFKB1 RELB NFKB2 ABCB1 ABCC1 ACHE ACTA2 AFP AHR AIP AKT1 ALOX12 ALOX5 APOE APP AR ARNT ATM B3GALT5 BAC BBC3 BCL2 BCL2A1 BCL2L1 BMPT2 BMP4 CALOR CASP1 CASP3 CASP9 CAT CCKAR CCL2 CCL5 CCN5 CCNB1 CCND1 CD14 CD44 CDK1 CDKN1A CDKN2C CFTR CHEK1 CHEK2 CHUK COL10A1 COL2A1 CPT1A CRP CS CSF2 CTNNB1 CXCL8 CYCB CYCS CYP1A1 CYP1A2 CYP1B1 CYP2C9 CYP2E1 CYP3A4 DHRS11 DHRS4 DIO2 DUOX1 EP300 ESR1 ESR2 FBP1 FN1 FOS GADD45B GCLC GPT GREB1 GSK3B GSTA1 GSTM2 GSTP1 H2AX HBB HCAR2 HGF HIF1A HMBOX1 ICAM1 IFNG IL1B IL32 IL4 IL5 IL6 INS1 IRAK1 ITGAM JUN KMT2A LAMB2 MAP3K7 MAPK1 MAPK3 MAPK8 MAPK9 MET MMP2 MOD2 MT2A MUC5AC NANOQ NCOA3 NFE2L2 NFKBIA NOS2 NOX4 NQO1 NR1I2 NR1I3 OCLN PARP1 PCNA PGR POU5F1 PPARG PPARG1A PSCA PTGES PTGS2 PYCARD RELA RIPK1 RPA3 RUNX2 SELE SFN SLC16A1 SLC2A1 SLC2A4 SLC5A8 SLC01B1 SLC01B3 SLC02B1 SOD1 SOD2 SOX9 SPP1 STAT1 STAT2 TFAM TFF1 TGFA TJP1 TK1 TNF TNFAIP3 TNFRSF11A TNFSF11 TP53 TP53I3 TP63 TP73 TRAF6 TSLP TUBB3 UCP1 UCP3 UGT1A1 UGT1A10 UGT1A3 UGT1A7 UGT1A8 UGT1A9 UTRN VCAM1 VDR VEGFA XDH ADAM17 BLVRA CPSF3 ERBB4 FLNB FUT8 Flot2 HSPA8 NUP214 PRO2                                                                                                                                                                                                                                                                                                                                                                                                                                                                                                                                                                                                                                                                                                                                                                                                                                                                                                                                                                                  |
| 46 | Kaempferol 3-O-beta-L-glucopyranoside                                                                                                                                                                  | P4HB GSK3A GFER CRS2 ECI1 EXOSC9 GID1A IMPDH KAP95 NCF2 PAL PAPI PRP24                                                                                                                                                                                                                                                                                                                                                                                                                                                                                                                                                                                                                                                                                                                                                                                                                                                                                                                                                                                                                                                                                                                                                                                                                                                                                                                                                                                                                                                                                                                                                                                                                                                                                                                                                                                                                                                                                                                                                                                                                                                                                                                                                                                                                                                                                                                                                                                                                                                                                                                                                                    |
| 47 | Sexangularetin                                                                                                                                                                                         | ACADS ACX1 ADAM17 At1g07440 At1g07450 BLVRA CUEDC1 ECH1 ERBB4 FLNB                                                                                                                                                                                                                                                                                                                                                                                                                                                                                                                                                                                                                                                                                                                                                                                                                                                                                                                                                                                                                                                                                                                                                                                                                                                                                                                                                                                                                                                                                                                                                                                                                                                                                                                                                                                                                                                                                                                                                                                                                                                                                                                                                                                                                                                                                                                                                                                                                                                                                                                                                                        |
| 48 | 3,5,7-trihydroxy-2-(4-hydroxyphenyl)-8-((3,4,5-trihydroxytetrahydro-2H-pyran-2-yl)oxy)-4H-chromen-4-one                                                                                                | ADAM17 Acox1 CC0490 CPSF3 CTDSP2 CUL5 Cyb5r3 DNAJC30 DSL1 FGA                                                                                                                                                                                                                                                                                                                                                                                                                                                                                                                                                                                                                                                                                                                                                                                                                                                                                                                                                                                                                                                                                                                                                                                                                                                                                                                                                                                                                                                                                                                                                                                                                                                                                                                                                                                                                                                                                                                                                                                                                                                                                                                                                                                                                                                                                                                                                                                                                                                                                                                                                                             |
| 49 | Kaempferol-7-rhamnoside                                                                                                                                                                                | ALAD BLVRA Cyb5a Cyb5b Ets1 GOT1 HGD Ighg1 MYD88 NCALD                                                                                                                                                                                                                                                                                                                                                                                                                                                                                                                                                                                                                                                                                                                                                                                                                                                                                                                                                                                                                                                                                                                                                                                                                                                                                                                                                                                                                                                                                                                                                                                                                                                                                                                                                                                                                                                                                                                                                                                                                                                                                                                                                                                                                                                                                                                                                                                                                                                                                                                                                                                    |
| 50 | 5-hydroxy-2-(4-hydroxy-3,5-dimethoxyphenyl)-7-((3,4,5-trihydroxy-6-(hydroxymethyl)tetrahydro-2H-pyran-2-yl)oxy)-4H-chromen-4-one                                                                       | CHI1 DPEP DSP EPHB2 GALM HAO1 LDHB RAB31 RNF8 RORA                                                                                                                                                                                                                                                                                                                                                                                                                                                                                                                                                                                                                                                                                                                                                                                                                                                                                                                                                                                                                                                                                                                                                                                                                                                                                                                                                                                                                                                                                                                                                                                                                                                                                                                                                                                                                                                                                                                                                                                                                                                                                                                                                                                                                                                                                                                                                                                                                                                                                                                                                                                        |
| 51 | 7-hydroxy-2-(4-hydroxy-3,5-dimethoxyphenyl)-5-((3,4,5-trihydroxy-6-(hydroxymethyl)tetrahydro-2H-pyran-2-yl)oxy)-4H-chromen-4-one                                                                       | ACR Ache Acox1 CST7 DEK DSP FAS2 HAO1 HECTD1 Lhx3                                                                                                                                                                                                                                                                                                                                                                                                                                                                                                                                                                                                                                                                                                                                                                                                                                                                                                                                                                                                                                                                                                                                                                                                                                                                                                                                                                                                                                                                                                                                                                                                                                                                                                                                                                                                                                                                                                                                                                                                                                                                                                                                                                                                                                                                                                                                                                                                                                                                                                                                                                                         |
| 52 | Tricin                                                                                                                                                                                                 | AKR1B1 PTGS1 PTGS2 Acox1 DRAP1 Ets1 FUT8 Flot2 GOT2 GRB14 HSPA8 MJ0158                                                                                                                                                                                                                                                                                                                                                                                                                                                                                                                                                                                                                                                                                                                                                                                                                                                                                                                                                                                                                                                                                                                                                                                                                                                                                                                                                                                                                                                                                                                                                                                                                                                                                                                                                                                                                                                                                                                                                                                                                                                                                                                                                                                                                                                                                                                                                                                                                                                                                                                                                                    |
|    | Acetazolamide                                                                                                                                                                                          | CA11 CA6 CA14 CA2 CA4 CA12 CA5B CA13 CA1 CA5A CA9 CA7 CA3 AQP4 MMP12 MMP2 ACAN ARNT COL18A1 CREBBP CTNND1 DCN EGFR EGLN1 EP300 FLT1 FYN HIF1A HIF1AN IL6 JAK1 JAK2 KDR MMP14 MMP9 NRP2 PXN SRC STAT3 TCEB1 TCEB2 TIMP1 TIMP2 TIMP3 VEGFA VHL SCN4A GH-LCR CACNA1A CA2 CACNA1S CA1 SLC2A1 KCNA2 CA14 DARS2 EA3 CACNB4 SCN2A SLC1A3 BPPV KCNA1 CA12 KCNJ2 PIGT CA5B PDHA1 GLUT1 DEE32 ASPRS. LBSL CACNL1A3 LQJ6 SCN2A1 EAATI AEMK HYPP HIRK1 CACNL1A4 NADP PHE1A HTLVR CCHL1A3 EA5 BFIC3 EA6 EA1 NAC1A KIR2.1 SCA6 PNH2 PDHAD DYT18 TTPP1 EI9G DEE11 HOKP2 IRK1 DEE42 MCAHS3 PED HOKP1 BFIS3 CMS16 L277 GLUT1DS MHS5 BSNIS SQT3 EI612 EA9 ATFB9 DY19 SDXCH                                                                                                                                                                                                                                                                                                                                                                                                                                                                                                                                                                                                                                                                                                                                                                                                                                                                                                                                                                                                                                                                                                                                                                                                                                                                                                                                                                                                                                                                                                                                                                                                                                                                                                                                                                                                                                                                                                                                                                                  |



**Table S2** Enriched KEGG pathways (false discovery rate <math>\leq E^{-6}</math>)

| <i>Rhodiola</i> | Acetazolamide                                                                                                                       | Combined                                                   |
|-----------------|-------------------------------------------------------------------------------------------------------------------------------------|------------------------------------------------------------|
| Term ID         | #term ID                                                                                                                            | #term ID                                                   |
| hsa05200        | hsa00910                                                                                                                            | hsa05200                                                   |
| hsa05418        | hsa04066                                                                                                                            | hsa05418                                                   |
| hsa05161        | hsa05211                                                                                                                            | hsa05161                                                   |
| hsa04068        | hsa05200                                                                                                                            | hsa04068                                                   |
| hsa05215        | hsa05205                                                                                                                            | hsa05215                                                   |
| hsa04933        | hsa01521                                                                                                                            | hsa04933                                                   |
| hsa04110        | hsa05167                                                                                                                            | hsa04110                                                   |
| hsa05206        | hsa04520                                                                                                                            | hsa05206                                                   |
| hsa04066        | hsa05219                                                                                                                            | hsa04066                                                   |
| hsa05203        | hsa05161                                                                                                                            | hsa05203                                                   |
| hsa05166        | hsa05206                                                                                                                            | hsa05166                                                   |
| hsa05167        | hsa04630                                                                                                                            | hsa05167                                                   |
| hsa04210        | hsa04510                                                                                                                            | hsa04210                                                   |
| hsa05202        |                                                                                                                                     | hsa05202                                                   |
| hsa05212        |                                                                                                                                     | hsa05212                                                   |
| hsa04010        |                                                                                                                                     | hsa04010                                                   |
| hsa04668        |                                                                                                                                     | hsa04668                                                   |
| hsa05162        |                                                                                                                                     | hsa05162                                                   |
| hsa01522        |                                                                                                                                     | hsa01522                                                   |
| hsa05165        |                                                                                                                                     | hsa05165                                                   |
| hsa04380        |                                                                                                                                     | hsa04380                                                   |
| hsa04151        |                                                                                                                                     | hsa04151                                                   |
| hsa05210        |                                                                                                                                     | hsa05210                                                   |
| hsa04218        |                                                                                                                                     | hsa04218                                                   |
| hsa04657        |                                                                                                                                     | hsa04657                                                   |
| hsa05225        |                                                                                                                                     | hsa05225                                                   |
| hsa04064        |                                                                                                                                     | hsa04064                                                   |
| hsa05169        |                                                                                                                                     | hsa05169                                                   |
| hsa05142        |                                                                                                                                     | hsa05142                                                   |
| hsa05164        |                                                                                                                                     | hsa05164                                                   |
| hsa05224        |                                                                                                                                     | hsa05224                                                   |
| hsa04659        |                                                                                                                                     | hsa04659                                                   |
| hsa05145        |                                                                                                                                     | hsa05145                                                   |
| hsa05152        |                                                                                                                                     | hsa05152                                                   |
| hsa04621        |                                                                                                                                     | hsa04621                                                   |
| hsa01521        |                                                                                                                                     | hsa01521                                                   |
| hsa04919        |                                                                                                                                     | hsa04919                                                   |
| hsa05134        |                                                                                                                                     | hsa05134                                                   |
| hsa05220        |                                                                                                                                     | hsa05220                                                   |
| hsa05205        |                                                                                                                                     | hsa05205                                                   |
| hsa04620        |                                                                                                                                     | hsa04620                                                   |
| hsa05218        |                                                                                                                                     | hsa05218                                                   |
| hsa04115        |                                                                                                                                     | hsa04115                                                   |
| hsa05214        |                                                                                                                                     | hsa05214                                                   |
| hsa05133        |                                                                                                                                     | hsa05133                                                   |
| hsa04914        |                                                                                                                                     | hsa04914                                                   |
| hsa04926        |                                                                                                                                     | hsa04926                                                   |
| hsa05223        |                                                                                                                                     | hsa05223                                                   |
| hsa05160        |                                                                                                                                     | hsa05160                                                   |
| hsa04915        |                                                                                                                                     | hsa04915                                                   |
| hsa05219        |                                                                                                                                     | hsa05219                                                   |
| hsa05222        |                                                                                                                                     | hsa05222                                                   |
| hsa05140        |                                                                                                                                     | hsa05140                                                   |
| hsa05221        |                                                                                                                                     | hsa05221                                                   |
| hsa05226        |                                                                                                                                     | hsa05226                                                   |
| hsa04660        |                                                                                                                                     | hsa04660                                                   |
| hsa05211        |                                                                                                                                     | hsa05211                                                   |
| hsa04917        |                                                                                                                                     | hsa04917                                                   |
| hsa05213        |                                                                                                                                     | hsa05213                                                   |
| hsa01524        |                                                                                                                                     | hsa01524                                                   |
| hsa04350        |                                                                                                                                     | hsa04350                                                   |
| hsa04932        |                                                                                                                                     | hsa04932                                                   |
| hsa05168        |                                                                                                                                     | hsa05168                                                   |
| hsa04722        |                                                                                                                                     | hsa04722                                                   |
| hsa01100        |                                                                                                                                     | hsa01100                                                   |
| hsa04140        |                                                                                                                                     | hsa04140                                                   |
| hsa05132        |                                                                                                                                     | hsa05132                                                   |
| hsa05230        |                                                                                                                                     | hsa05230                                                   |
| hsa04550        |                                                                                                                                     | hsa04550                                                   |
| hsa05321        |                                                                                                                                     | hsa05321                                                   |
| hsa04920        |                                                                                                                                     | hsa04920                                                   |
| hsa04012        |                                                                                                                                     | hsa04012                                                   |
| hsa04211        |                                                                                                                                     | hsa04211                                                   |
| hsa04371        |                                                                                                                                     | hsa04371                                                   |
| hsa04024        |                                                                                                                                     | hsa04024                                                   |
| hsa00140        |                                                                                                                                     | hsa00140                                                   |
| hsa04060        |                                                                                                                                     | hsa04060                                                   |
| hsa04664        |                                                                                                                                     | hsa04664                                                   |
| hsa05034        |                                                                                                                                     | hsa05034                                                   |
| hsa05216        |                                                                                                                                     | hsa05216                                                   |
| hsa04630        |                                                                                                                                     | hsa04630                                                   |
| hsa05204        |                                                                                                                                     | hsa05204                                                   |
| hsa04137        |                                                                                                                                     | hsa04137                                                   |
| hsa05323        |                                                                                                                                     | hsa05323                                                   |
| hsa04931        |                                                                                                                                     | hsa04931                                                   |
| hsa04520        |                                                                                                                                     | hsa04520                                                   |
| hsa04370        |                                                                                                                                     | hsa04370                                                   |
| hsa04510        |                                                                                                                                     | hsa04510                                                   |
| hsa01523        |                                                                                                                                     | hsa01523                                                   |
| hsa04934        |                                                                                                                                     | hsa04934                                                   |
| hsa04213        |                                                                                                                                     | hsa04213                                                   |
| hsa00980        |                                                                                                                                     | hsa00980                                                   |
| hsa04015        |                                                                                                                                     | hsa04015                                                   |
| hsa05146        |                                                                                                                                     | hsa05146                                                   |
| hsa05120        |                                                                                                                                     | hsa05120                                                   |
| hsa04152        |                                                                                                                                     | hsa04152                                                   |
| hsa04217        |                                                                                                                                     | hsa04217                                                   |
| hsa04071        |                                                                                                                                     | hsa04071                                                   |
| hsa00910        |                                                                                                                                     | hsa00910                                                   |
| hsa04725        |                                                                                                                                     | hsa04725                                                   |
| hsa04658        |                                                                                                                                     | hsa04658                                                   |
| hsa04726        |                                                                                                                                     | hsa04726                                                   |
| hsa00982        |                                                                                                                                     | hsa00982                                                   |
| hsa05144        |                                                                                                                                     | hsa05144                                                   |
| hsa04922        |                                                                                                                                     | hsa04922                                                   |
| hsa04910        |                                                                                                                                     | hsa04910                                                   |
| hsa04062        |                                                                                                                                     | hsa04062                                                   |
| hsa04014        |                                                                                                                                     | hsa04014                                                   |
| hsa01200        |                                                                                                                                     | hsa01200                                                   |
| hsa04114        |                                                                                                                                     | hsa04114                                                   |
| hsa04728        |                                                                                                                                     | hsa04728                                                   |
| hsa05030        |                                                                                                                                     | hsa05030                                                   |
| hsa04662        |                                                                                                                                     | hsa04662                                                   |
| hsa04976        |                                                                                                                                     | hsa04976                                                   |
| hsa05010        |                                                                                                                                     | hsa05010                                                   |
| hsa04215        |                                                                                                                                     | hsa04215                                                   |
| hsa04916        |                                                                                                                                     | hsa04916                                                   |
| hsa04390        |                                                                                                                                     | hsa04390                                                   |
| hsa05020        |                                                                                                                                     | hsa05020                                                   |
| hsa04622        |                                                                                                                                     | hsa04622                                                   |
| hsa01212        |                                                                                                                                     | hsa01212                                                   |
| hsa05131        |                                                                                                                                     | hsa05131                                                   |
| hsa05014        |                                                                                                                                     | hsa05014                                                   |
| hsa00983        |                                                                                                                                     | hsa00983                                                   |
| hsa04921        |                                                                                                                                     | hsa04921                                                   |
| hsa04141        |                                                                                                                                     | hsa04141                                                   |
| hsa04912        |                                                                                                                                     | hsa04912                                                   |
| hsa05231        |                                                                                                                                     | hsa05231                                                   |
| hsa00071        |                                                                                                                                     | hsa00071                                                   |
| hsa02010        |                                                                                                                                     | hsa02010                                                   |
| hsa04623        |                                                                                                                                     | hsa04623                                                   |
| hsa03320        |                                                                                                                                     | hsa03320                                                   |
| hsa05416        |                                                                                                                                     | hsa05416                                                   |
| hsa05143        |                                                                                                                                     | hsa05143                                                   |
| hsa05016        |                                                                                                                                     | hsa05016                                                   |
| hsa00350        |                                                                                                                                     | hsa00350                                                   |
| hsa00010        |                                                                                                                                     | hsa00010                                                   |
| hsa04540        |                                                                                                                                     | hsa04540                                                   |
| hsa05200        | Pathways in cancer                                                                                                                  | Pathways in cancer                                         |
| hsa05418        | Fluid shear stress and atherosclerosis                                                                                              | Fluid shear stress and atherosclerosis                     |
| hsa05161        | Hepatitis B                                                                                                                         | Hepatitis B                                                |
| hsa04068        | FoxO signaling pathway                                                                                                              | FoxO signaling pathway                                     |
| hsa05215        | Prostate cancer                                                                                                                     | Prostate cancer                                            |
| hsa04933        | Advanced glycation end products-receptor for advanced glycation end products (AGE-RAGE) signaling pathway in diabetic complications | AGE-RAGE signaling pathway in diabetic complications       |
| hsa04110        | Cell cycle                                                                                                                          | Cell cycle                                                 |
| hsa05206        | MicroRNAs in cancer                                                                                                                 | MicroRNAs in cancer                                        |
| hsa04066        | HIF-1 signaling pathway                                                                                                             | HIF-1 signaling pathway                                    |
| hsa05203        | Viral carcinogenesis                                                                                                                | Viral carcinogenesis                                       |
| hsa05166        | HTLV-I infection                                                                                                                    | HTLV-I infection                                           |
| hsa05167        | Kaposi's sarcoma-associated herpesvirus infection                                                                                   | Kaposi's sarcoma-associated herpesvirus infection          |
| hsa04210        | Apoptosis                                                                                                                           | Apoptosis                                                  |
| hsa05202        | Transcriptional misregulation in cancer                                                                                             | Transcriptional misregulation in cancer                    |
| hsa05212        | Pancreatic cancer                                                                                                                   | Pancreatic cancer                                          |
| hsa04010        | Mitogen-activated protein kinase (MAPK) signaling pathway                                                                           | MAPK signaling pathway                                     |
| hsa04668        | Tumor necrosis factor (TNF) signaling pathway                                                                                       | TNF signaling pathway                                      |
| hsa05162        | Measles                                                                                                                             | Measles                                                    |
| hsa01522        | Endocrine resistance                                                                                                                | Endocrine resistance                                       |
| hsa05165        | Human papillomavirus infection                                                                                                      | Human papillomavirus infection                             |
| hsa04380        | Osteoclast differentiation                                                                                                          | Osteoclast differentiation                                 |
| hsa04151        | Phosphatidylinositol 3'-kinase (PI3K-Akt) signaling pathway                                                                         | PI3K-Akt signaling pathway                                 |
| hsa05210        | Colorectal cancer                                                                                                                   | Colorectal cancer                                          |
| hsa04218        | Cellular senescence                                                                                                                 | Cellular senescence                                        |
| hsa04657        | Interleukin 17 (IL-17) signaling pathway                                                                                            | IL-17 signaling pathway                                    |
| hsa05225        | Hepatocellular carcinoma                                                                                                            | Hepatocellular carcinoma                                   |
| hsa04064        | Nuclear factor-kappa B (NF-kappa B) signaling pathway                                                                               | NF-kappa B signaling pathway                               |
| hsa05169        | Epstein-Barr virus infection                                                                                                        | Epstein-Barr virus infection                               |
| hsa05142        | Chagas disease (American trypanosomiasis)                                                                                           | Chagas disease (American trypanosomiasis)                  |
| hsa05164        | Influenza A                                                                                                                         | Influenza A                                                |
| hsa05224        | Breast cancer                                                                                                                       | Breast cancer                                              |
| hsa04659        | Th17 cell differentiation                                                                                                           | Th17 cell differentiation                                  |
| hsa05145        | Toxoplasmosis                                                                                                                       | Toxoplasmosis                                              |
| hsa05152        | Tuberculosis                                                                                                                        | Tuberculosis                                               |
| hsa04621        | Nucleotide-binding and oligomerization domain (NOD)-like receptor signaling pathway                                                 | NOD-like receptor signaling pathway                        |
| hsa01521        | Epidermal growth factor receptor (EGFR) tyrosine kinase inhibitor resistance                                                        | EGFR tyrosine kinase inhibitor resistance                  |
| hsa04919        | Thyroid hormone signaling pathway                                                                                                   | Thyroid hormone signaling pathway                          |
| hsa05134        | Legionellosis                                                                                                                       | Legionellosis                                              |
| hsa05220        | Chronic myeloid leukemia                                                                                                            | Chronic myeloid leukemia                                   |
| hsa05205        | Proteoglycans in cancer                                                                                                             | Proteoglycans in cancer                                    |
| hsa04620        | Toll-like receptor signaling pathway                                                                                                | Toll-like receptor signaling pathway                       |
| hsa05218        | Melanoma                                                                                                                            | Melanoma                                                   |
| hsa04115        | p53 signaling pathway                                                                                                               | p53 signaling pathway                                      |
| hsa05214        | Glioma                                                                                                                              | Glioma                                                     |
| hsa05133        | Pertussis                                                                                                                           | Pertussis                                                  |
| hsa04914        | Progesterone-mediated oocyte maturation                                                                                             | Progesterone-mediated oocyte maturation                    |
| hsa04926        | Relaxin signaling pathway                                                                                                           | Relaxin signaling pathway                                  |
| hsa05223        | Non-small cell lung cancer                                                                                                          | Non-small cell lung cancer                                 |
| hsa05160        | Hepatitis C                                                                                                                         | Hepatitis C                                                |
| hsa04915        | Estrogen signaling pathway                                                                                                          | Estrogen signaling pathway                                 |
| hsa05219        | Bladder cancer                                                                                                                      | Bladder cancer                                             |
| hsa05222        | Small cell lung cancer                                                                                                              | Small cell lung cancer                                     |
| hsa05140        | Leishmaniasis                                                                                                                       | Leishmaniasis                                              |
| hsa05221        | Acute myeloid leukemia                                                                                                              | Acute myeloid leukemia                                     |
| hsa05226        | Gastric cancer                                                                                                                      | Gastric cancer                                             |
| hsa04660        | T cell receptor signaling pathway                                                                                                   | T cell receptor signaling pathway                          |
| hsa05211        | Renal cell carcinoma                                                                                                                | Renal cell carcinoma                                       |
| hsa04917        | Prolactin signaling pathway                                                                                                         | Prolactin signaling pathway                                |
| hsa05213        | Endometrial cancer                                                                                                                  | Endometrial cancer                                         |
| hsa01524        | Platinum drug resistance                                                                                                            | Platinum drug resistance                                   |
| hsa04350        | transforming growth factor-beta (TGF-beta) signaling pathway                                                                        | TGF-beta signaling pathway                                 |
| hsa04932        | Non-alcoholic fatty liver disease (NAFLD)                                                                                           | Non-alcoholic fatty liver disease (NAFLD)                  |
| hsa05168        | Herpes simplex infection                                                                                                            | Herpes simplex infection                                   |
| hsa04722        | Neurotrophin signaling pathway                                                                                                      | Neurotrophin signaling pathway                             |
| hsa01100        | Metabolic pathways                                                                                                                  | Metabolic pathways                                         |
| hsa04140        | Autophagy—animal                                                                                                                    | Autophagy—animal                                           |
| hsa05132        | Salmonella infection                                                                                                                | Salmonella infection                                       |
| hsa05230        | Central carbon metabolism in cancer                                                                                                 | Central carbon metabolism in cancer                        |
| hsa04550        | Signaling pathways regulating pluripotency of stem cells                                                                            | Signaling pathways regulating pluripotency of stem cells   |
| hsa05321        | Inflammatory bowel disease (IBD)                                                                                                    | Inflammatory bowel disease (IBD)                           |
| hsa04920        | Adipocytokine signaling pathway                                                                                                     | Adipocytokine signaling pathway                            |
| hsa04012        | Receptor tyrosine-protein kinase erbB (ErbB) signaling pathway                                                                      | ErbB signaling pathway                                     |
| hsa04211        | Longevity regulating pathway                                                                                                        | Longevity regulating pathway                               |
| hsa04371        | Apelin signaling pathway                                                                                                            | Apelin signaling pathway                                   |
| hsa04024        | Cyclic adenosine 3', 5'-monophosphate (cAMP) signaling pathway                                                                      | cAMP signaling pathway                                     |
| hsa00140        | Steroid hormone biosynthesis                                                                                                        | Steroid hormone biosynthesis                               |
| hsa04060        | Cytokine-cytokine receptor interaction                                                                                              | Cytokine-cytokine receptor interaction                     |
| hsa04664        | Receptor for the Fc region of IgE (Fc epsilon RI) signaling pathway                                                                 | Fc epsilon RI signaling pathway                            |
| hsa05034        | Alcoholism                                                                                                                          | Alcoholism                                                 |
| hsa05216        | Thyroid cancer                                                                                                                      | Thyroid cancer                                             |
| hsa04630        | Janus kinase/signal transducers and activators of transcription (Jak-STAT) signaling pathway                                        | Jak-STAT signaling pathway                                 |
| hsa05204        | Chemical carcinogenesis                                                                                                             | Chemical carcinogenesis                                    |
| hsa04137        | Mitophagy—animal                                                                                                                    | Mitophagy—animal                                           |
| hsa05323        | Rheumatoid arthritis                                                                                                                | Rheumatoid arthritis                                       |
| hsa04931        | Insulin resistance                                                                                                                  | Insulin resistance                                         |
| hsa04520        | Adherens junction                                                                                                                   | Adherens junction                                          |
| hsa04370        | Vascular endothelial growth factor (VEGF) signaling pathway                                                                         | VEGF signaling pathway                                     |
| hsa04510        | Focal adhesion                                                                                                                      | Focal adhesion                                             |
| hsa01523        | Antifolate resistance                                                                                                               | Antifolate resistance                                      |
| hsa04934        | Cushing's syndrome                                                                                                                  | Cushing's syndrome                                         |
| hsa04213        | Longevity regulating pathway - multiple species                                                                                     | Longevity regulating pathway - multiple species            |
| hsa00980        | Metabolism of xenobiotics by cytochrome P450                                                                                        | Metabolism of xenobiotics by cytochrome P450               |
| hsa04015        | Rap1 signaling pathway                                                                                                              | Rap1 signaling pathway                                     |
| hsa05146        | Amoebiasis                                                                                                                          | Amoebiasis                                                 |
| hsa05120        | Epithelial cell signaling in Helicobacter pylori infection                                                                          | Epithelial cell signaling in Helicobacter pylori infection |
| hsa04152        | AMP-activated protein kinase (AMPK) signaling pathway                                                                               | AMPK signaling pathway                                     |
| hsa04217        | Necroptosis                                                                                                                         | Necroptosis                                                |
| hsa04071        | Sphingolipid signaling pathway                                                                                                      | Sphingolipid signaling pathway                             |
| hsa00910        | Nitrogen metabolism                                                                                                                 | Nitrogen metabolism                                        |
| hsa04725        | Cholinergic synapse                                                                                                                 | Cholinergic synapse                                        |
| hsa04658        | Th1 and Th2 cell differentiation                                                                                                    | Th1 and Th2 cell differentiation                           |
| hsa04726        | Serotonergic synapse                                                                                                                | Serotonergic synapse                                       |
| hsa00982        | Drug metabolism - cytochrome P450                                                                                                   | Drug metabolism - cytochrome P450                          |
| hsa05144        | Malaria                                                                                                                             | Malaria                                                    |
| hsa04922        | Glucagon signaling pathway                                                                                                          | Glucagon signaling pathway                                 |
| hsa04910        | Insulin signaling pathway                                                                                                           | Insulin signaling pathway                                  |
| hsa04062        | Chemokine signaling pathway                                                                                                         | Chemokine signaling pathway                                |
| hsa04014        | Ras signaling pathway                                                                                                               | Ras signaling pathway                                      |
| hsa01200        | Carbon metabolism                                                                                                                   | Carbon metabolism                                          |
| hsa04114        | Oocyte meiosis                                                                                                                      | Oocyte meiosis                                             |
| hsa04728        | Dopaminergic synapse                                                                                                                | Dopaminergic synapse                                       |
| hsa05030        | Cocaine addiction                                                                                                                   | Cocaine addiction                                          |
| hsa04662        | B cell receptor signaling pathway                                                                                                   | B cell receptor signaling pathway                          |
| hsa04976        | Bile secretion                                                                                                                      | Bile secretion                                             |
| hsa05010        | Alzheimer's disease                                                                                                                 | Alzheimer's disease                                        |
| hsa04215        | Apoptosis - multiple species                                                                                                        | Apoptosis - multiple species                               |
| hsa04916        | Melanogenesis                                                                                                                       | Melanogenesis                                              |
| hsa04390        | Hippo signaling pathway                                                                                                             | Hippo signaling pathway                                    |
| hsa05020        | Prion diseases                                                                                                                      | Prion diseases                                             |
| hsa04622        | Retinoic acid-inducible gene I (RIG-I)-like receptor signaling pathway                                                              | RIG-I-like receptor signaling pathway                      |
| hsa01212        | Fatty acid metabolism                                                                                                               | Fatty acid metabolism                                      |
| hsa05131        | Shigellosis                                                                                                                         | Shigellosis                                                |
| hsa05014        | Amyotrophic lateral sclerosis (ALS)                                                                                                 | Amyotrophic lateral sclerosis (ALS)                        |
| hsa00983        | Drug metabolism - other enzymes                                                                                                     | Drug metabolism - other enzymes                            |
| hsa04921        | Oxytocin signaling pathway                                                                                                          | Oxytocin signaling pathway                                 |
| hsa04141        | Protein processing in endoplasmic reticulum                                                                                         | Protein processing in endoplasmic reticulum                |
| hsa04912        | GnRH signaling pathway                                                                                                              | GnRH signaling pathway                                     |
| hsa05231        | Choline metabolism in cancer                                                                                                        | Choline metabolism in cancer                               |
| hsa00071        | Fatty acid degradation                                                                                                              | Fatty acid degradation                                     |
| hsa02010        | Human ATP-binding cassette (ABC) transporters                                                                                       | ABC transporters                                           |
| hsa04623        | Cytosolic DNA-sensing pathway                                                                                                       | Cytosolic DNA-sensing pathway                              |
| hsa03320        | PPAR signaling pathway                                                                                                              | PPAR signaling pathway                                     |
| hsa05416        | Viral myocarditis                                                                                                                   | Viral myocarditis                                          |
| hsa05143        | African trypanosomiasis                                                                                                             | African trypanosomiasis                                    |
| hsa05016        | Huntington's disease                                                                                                                | Huntington's disease                                       |
| hsa00350        | Tyrosine metabolism                                                                                                                 | Tyrosine metabolism                                        |
| hsa00010        | Glycolysis / Gluconeogenesis                                                                                                        | Glycolysis / Gluconeogenesis                               |
| hsa04540        | Gap junction                                                                                                                        | Gap junction                                               |

**Table S3** Disease-related genes

| Keywords                        | Related genes                                                                                                                                                                                                                                                                                                       |
|---------------------------------|---------------------------------------------------------------------------------------------------------------------------------------------------------------------------------------------------------------------------------------------------------------------------------------------------------------------|
| Altitude sickness               | GUCY1A1 SDC4 FOS CA2 CLU TIMP1 CDKN1B JTB KNG2 FAS RAB40C UMOD MPO CYP2B15 CASP3 SMARCC1 STYX ARHGAP45 CA1 CD5 RGS8 CBX3 NKX2-1 CA3 ELANE PLA2G1B RBMX MYO9B NNAT SCHIP1 POU2F1 TRIM25 TMEM30B PTPRR ARHGAP45 CA4 MECR PPM1B BMPR2 ARID2 DDX6 CA12 DDX3X BCKDHB POLR1B SATB1 WNK1 AKAP9 GRK6                        |
| Brain edema                     | TNF NOS2 S100B PLAU MYLK MYL9 NAXE ZNHIT3 MMP9 PLAT NTN1 BCL2 CASP3 BAX CAT FOS JUN RELA MAPK3 MAPK1 IL6 CTNNB1 HMOX1 VCAM1 CCL2 IL1B VEGFA GSK3B AGT SOD2 BDNF PTGS2 FAS COL1A1 CREB1 PARP1 NFE2L2 AKT1 CDKN1A NOS3 NFKBIA EGR1 CASP9 MAPK8 SOD1 CCND1 MMP2 BCL2L1 JUNB NFKB1                                      |
| Hypoxia, brain                  | VEGFA HIF1A NOS2 ITPR2 IRAK1 ITPR1 IRAK4 PNPO HPCAL1 GFAP CDKN1A CCNA2 CASP4 NFKBIA SGK1 NOS1 CTNNB1 CCND1 SLC4A3 MAPK3 MAPK1 CCL2 PLCG1 RGS4 CASP9 TH SPHK1 BCL2L1 MAPK14 GDNF FBXO32 DDIT3 CTSK ADORA1 TP53 NFKBIA MAPK8IP3 TRP53 CREB1 CRH BDNF TRIM63 PLEKHA5 JUN MMP9 RGS2 CREB1 ATF6 CASP8 CYCS               |
| Hypoxia                         | TNF NOS2 S100B PLAU MYLK MYL9 NAXE ZNHIT3 MMP9 PLAT NTN1 BCL2 CASP3 BAX CAT FOS JUN RELA MAPK3 MAPK1 IL6 CTNNB1 HMOX1 VCAM1 CCL2 IL1B VEGFA GSK3B AGT SOD2 BDNF PTGS2 FAS COL1A1 CREB1 PARP1 NFE2L2 AKT1 CDKN1A NOS3 NFKBIA EGR1 CASP9 MAPK8 SOD1 CCND1 MMP2 BCL2L1 JUNB NFKB1                                      |
| Hypoxia-ischemia, brain         | VEGFA HIF1A NOS2 IRAK1 IRAK4 PNPO HPCAL1 GFAP CDKN1A CCNA2 CASP4 NFKBIA SGK1 NOS1 CTNNB1 CCND1 MAPK3 MAPK1 CCL2 PLCG1 RGS4 CASP9 TH SPHK1 BCL2L1 MAPK14 GDNF FBXO32 DDIT3 CTSK TP53 MAPK8IP3 TRP53 CRH BDNF TRIM63 PLEKHA5 JUN MMP9 RGS2 CREB1 ATF6 CASP8 CYCS CCND3 SQSTM1 CASP3 VCAM1 ARHGAP29 GSK3B              |
| Polycythemia                    | GH1 JAK2 EPOR BPGM EGLN1 EPAS1 EPOR HBA1 HBB JAK2 SH2B3 SLC30A10 VHL GSK3B ENG BAX PPARGC1A EDNRA EDN1 CYBA IL1B IL1A NOS3 TYK2 ITPKB COL1A1 KCND3 IL6 CD151 PPIB ACE COL3A1 SIVA1 PRKCA TOMM20 NFE2L1 RELA PDE10A PRL XDH AGTR2 BCL2 ATRX TLR4 TGFB1 CYP19A1 CKS2 FOS CREB1 CYCS                                   |
| Pulmonary arterial hypertension | BMPR2 CTNNB1 AGTR1 APECAM1 ACE2 EDNRA MYD88 VEGFA NOX4 TNFRSF13C BCL2A1B ACE GFAP TFRC MS4A6D CLEC5A CRLF2 GPR65 NOS2 TNFSF10 IL18 RELA TREM1 CD19 CXCL10 CLEC4E MS4A1 KCNE2 CCL5 TLR4 FNDC1 CAR8 CXCL1 LYVE1 IL17RA NOD2 RETNLA CD3G RMDN2 TIMP1 CD22 VCAM1 EDN1 GSK3B POLR1B MAPK3 MAPK1 IRAK3 TLR9 KCNB1         |
| Pulmonary edema of mountaineers | GUCY1A1 SMARCC1 ARHGAP45 CBX3 RBMX POU2F1 TRIM25 CA1 PPM1B BMPR2 CA12 DDX3X AKAP9 ANP32A ITPR2 CA9 CD47 CIRBP HTRA1 SC5D AQP1 CA2 NDRG1 CCND2 MT1 EDN1 FOS BEC-1 CA6 FAM192BP ZFP617 CA7 CA14 AKAP17B ZFP322A CA5B ADA2B CA15A CBLN6 CCL19A.2 CTAGE3P EPA1 FGF2BP2A H41 HCCSB LRRC2-AS1 MRPS31P5 RCP9 RHOXF2B SAS10 |
